# Supplementary material for: Use of crown ethers to isolate intermediates in ammonia-borane dehydrocoupling reactions
Source: Royal Society of Chemistry journal article supplement (doi:10.1039/c6cc00088f), 2016-01-01
Supplement: c6cc00088f1.pdf [file c6cc00088f1.pdf]

## Use of Crown Ethers to Isolate Intermediates in Ammonia-Borane Dehydrocoupling Reactions

Robert J. Less,\* Raúl García-Rodríguez, Hayley. R. Simmonds, Lucy. K. Allen, Andrew D. Bond and Dominic S. Wright

### Supplementary Information

#### Syntheses

##### General experimental procedures

All preparations were performed on a double-manifold vacuum line under a nitrogen atmosphere. The products were isolated and stored with the aid of a nitrogen-filled glove box (Saffron type b), equipped with Cu and molecular sieve columns in order to remove O<sub>2</sub> and moisture, respectively. All <sup>11</sup>B, <sup>1</sup>H and <sup>13</sup>C NMR spectra were recorded using a Bruker DPX 500 MHz NMR spectrometer (<sup>1</sup>H, <sup>13</sup>C referenced to SiMe<sub>4</sub>, <sup>11</sup>B referenced to BF<sub>3</sub>·Et<sub>2</sub>O, <sup>27</sup>Al referenced to AlCl<sub>3</sub>·6H<sub>2</sub>O-D<sub>2</sub>O). Elemental (C, H, N) analyses were obtained using an Exeter CE-440 Elemental Analyser. Solvents and amine bases were dried by distillation over an appropriate drying agent: THF, Et<sub>2</sub>O (both Na/benzophenone), CH<sub>2</sub>Cl<sub>2</sub>, CD<sub>2</sub>Cl<sub>2</sub>, Et<sub>3</sub>N, <sup>i</sup>Pr<sub>2</sub>EtN (all CaH<sub>2</sub>), CDCl<sub>3</sub> (P<sub>2</sub>O<sub>5</sub>). AlCl<sub>3</sub> was sublimed before use. Ammonia borane and 18-crown-6 were used as supplied (Sigma-Aldrich).

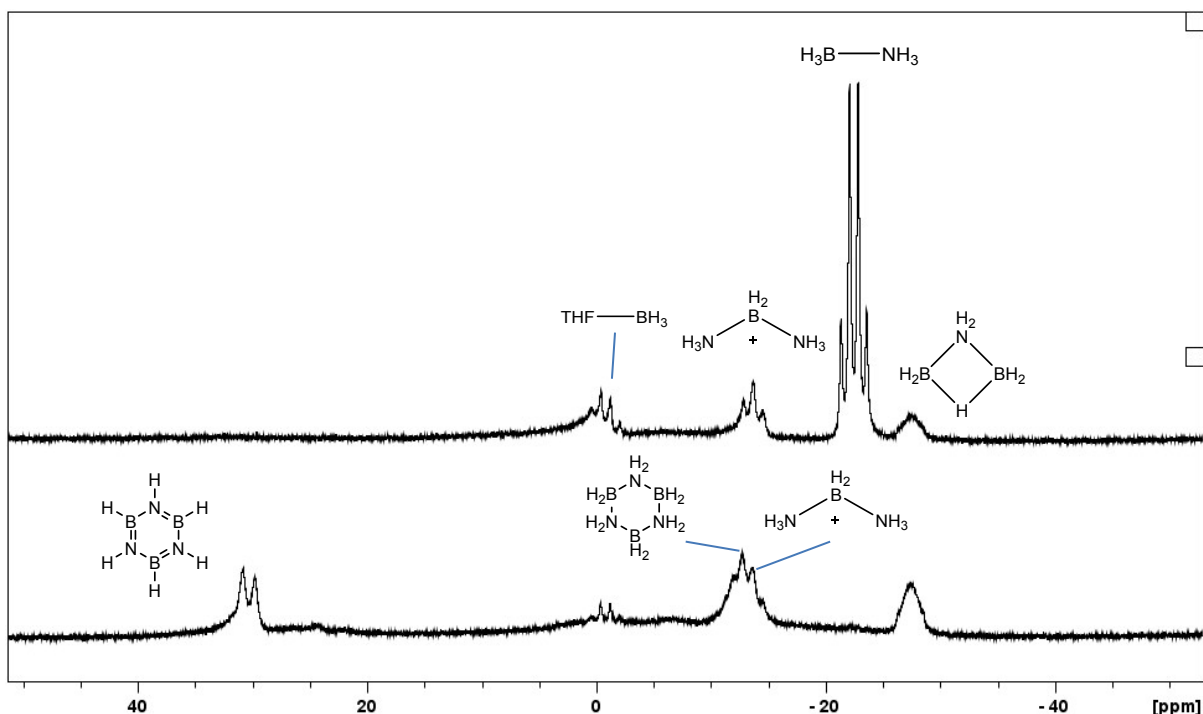

**Figure S1** *In situ* <sup>11</sup>B NMR spectra of AB + AlCl<sub>3</sub> (1 eq.) in THF after 16h at room temperature (top) and after 16h reflux (bottom).

**Synthesis of [(THF)BH<sub>2</sub>NH<sub>3</sub>(18-C-6)][AlCl<sub>4</sub>]****[1·THF(18-C-6)][AlCl<sub>4</sub>]**

AlCl<sub>3</sub> (864 mg, 6.48 mmol) was added to a solution of ammonia borane (50 mg, 1.62 mmol) and 18-crown-6 (428 mg, 1.62 mmol) in 3 ml THF at 0°C [AB(18-C-6) is only partially soluble]. The solution was allowed to warm to room temperature and was stirred for 16h. The reaction mixture was then filtered and layered with 10 ml diethyl ether in a 20 mm diameter tube. After 3d crystals were collected and recrystallised a second time in the same manner (THF-diethyl ether) to yield colourless needles (330 mg, 38 %).

Found (%): C 35.55, H 6.91, N 2.88; Calculated for C<sub>16</sub>H<sub>37</sub>AlBCl<sub>4</sub>NO<sub>7</sub>: C 35.92, H 6.97, N 2.62.

<sup>11</sup>B NMR (128.4 MHz, 25 °C, CDCl<sub>3</sub>), δ/ppm = 1.2 (br).

<sup>1</sup>H NMR (400.1 MHz, 25 °C, CDCl<sub>3</sub>), δ/ppm = 5.63 (br s, 3H, NH<sub>3</sub>), 4.36 (m, 4H, THF), 3.63 (s, 24H, 18-C-6), 2.60 (br, 2H, BH<sub>2</sub>), 2.29 (m, 4H, THF).

<sup>13</sup>C NMR (100.6 MHz, 25 °C, CDCl<sub>3</sub>), δ/ppm = 79.77 (THF), 70.31 (18-C-6), 25.51 (THF).

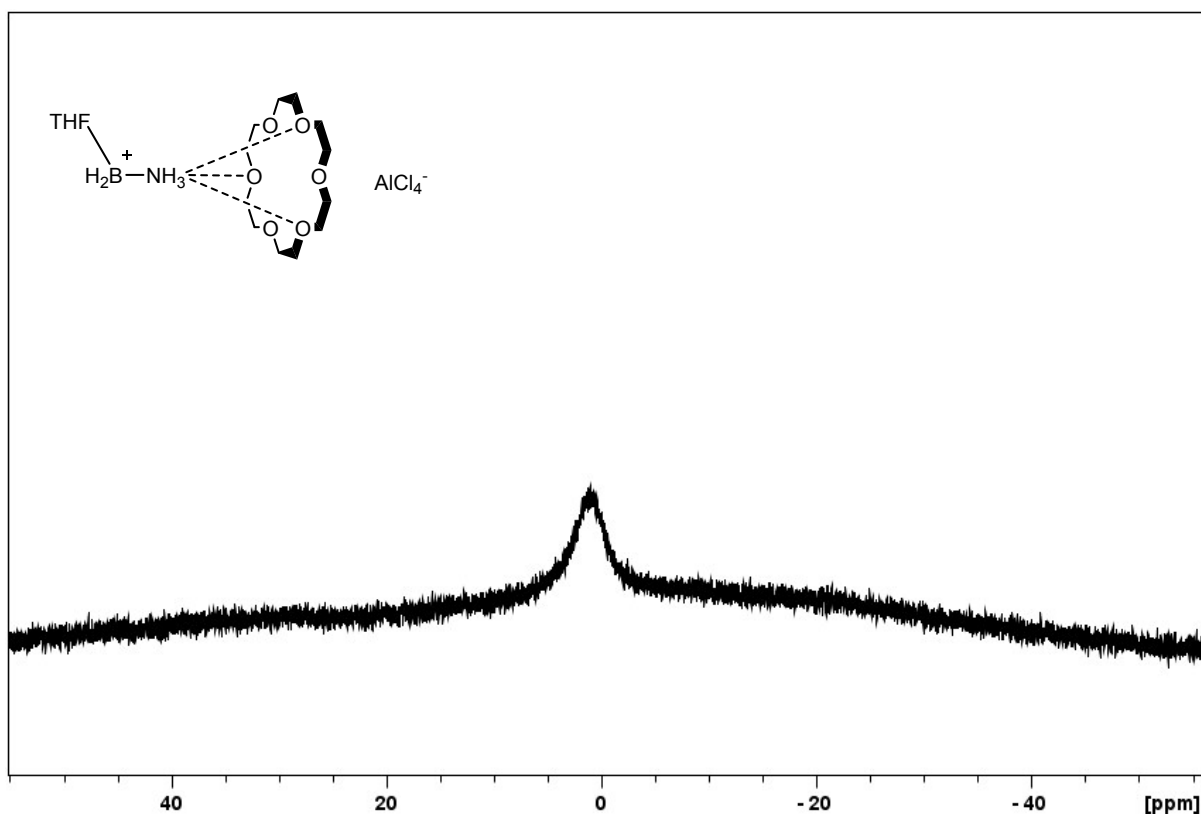

**Figure S2** <sup>11</sup>B NMR spectrum of [(THF)BH<sub>2</sub>NH<sub>3</sub>(18-C-6)][AlCl<sub>4</sub>] in CDCl<sub>3</sub>.

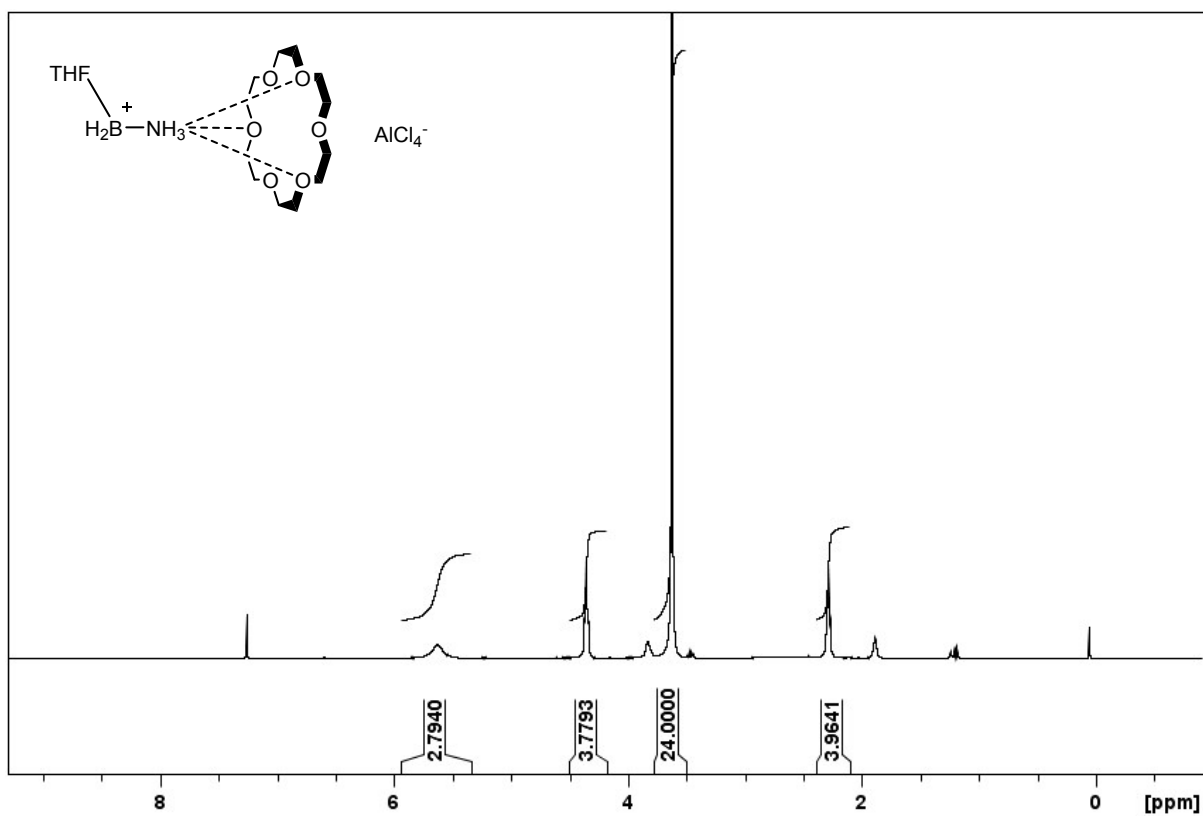

Figure S3  $^1\text{H}$  NMR spectrum of  $[(\text{THF})\text{BH}_2\text{NH}_3(18\text{-C-}6)][\text{AlCl}_4]$  in  $\text{CDCl}_3$ .

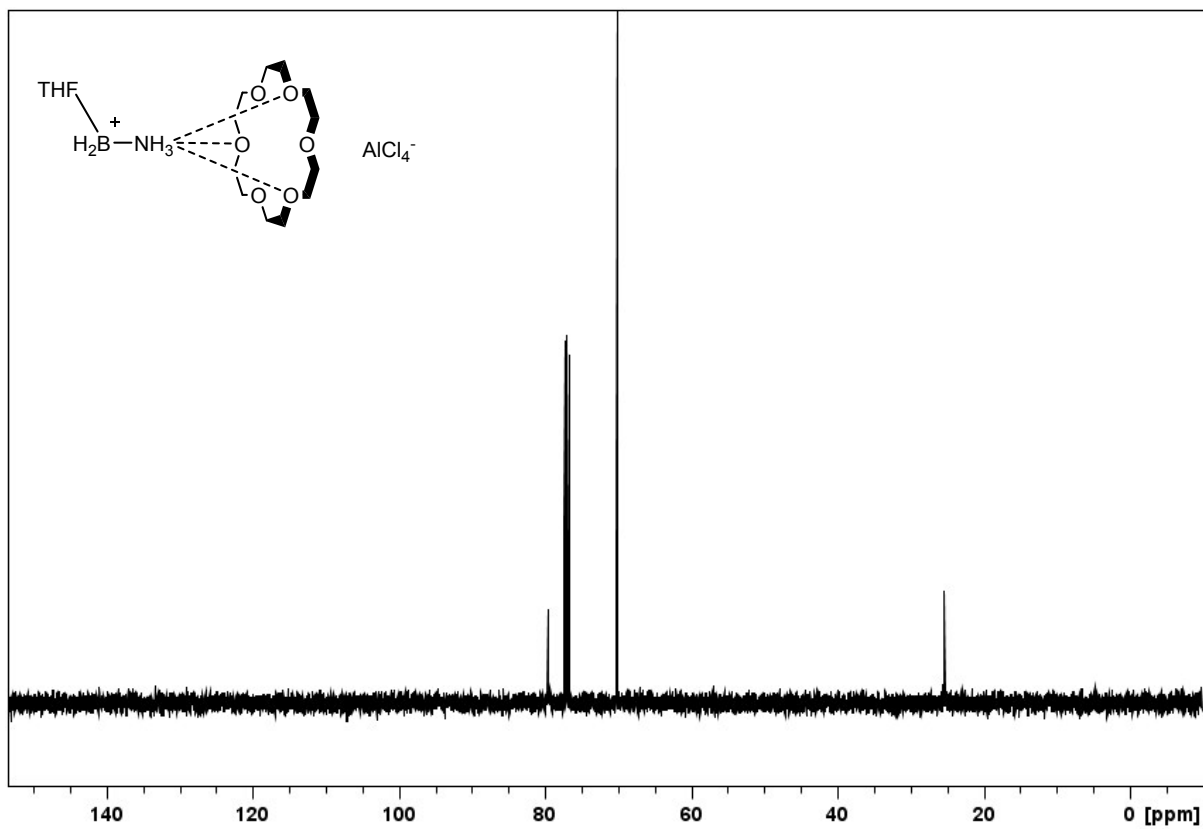

Figure S4  $^{13}\text{C}\{^1\text{H}\}$  NMR spectrum of  $[(\text{THF})\text{BH}_2\text{NH}_3(18\text{-C-}6)][\text{AlCl}_4]$  in  $\text{CDCl}_3$ .

**Synthesis of [BH<sub>2</sub>(NH<sub>3</sub>)<sub>2</sub>(18-C-6)<sub>2</sub>][AlCl<sub>4</sub>]****[2(18-C-6)<sub>2</sub>][AlCl<sub>4</sub>]**

AlCl<sub>3</sub> (108 mg, 0.81 mmol) was added to a solution of ammonia borane (25 mg, 0.81 mmol), NH<sub>4</sub>Cl (43 mg, 0.81 mmol) and 18-crown-6 (426 mg, 1.62 mmol) in 5 ml THF and the mixture heated to reflux for 16h. The solution was filtered and layered with 10 ml diethyl ether in a 20 mm diameter tube. After 3d the crystals were collected and dried *in vacuo* (370 mg, 61 %).

Found (%): C 38.72, H 8.01, N 3.70; Calculated for C<sub>24</sub>H<sub>56</sub>AlBCl<sub>4</sub>N<sub>2</sub>O<sub>12</sub>: C 38.73, H 7.58, N 3.76.

<sup>11</sup>B NMR (128.4 MHz, 25 °C, CDCl<sub>3</sub>), δ/ppm = -13.7 (br).

<sup>1</sup>H NMR (400.1 MHz, 25 °C, CDCl<sub>3</sub>), δ/ppm = 5.90 (br s, 6H, NH<sub>3</sub>), 3.66 (s, 48H, 18-C-6), 2.06 (br, 2H, BH<sub>2</sub>).

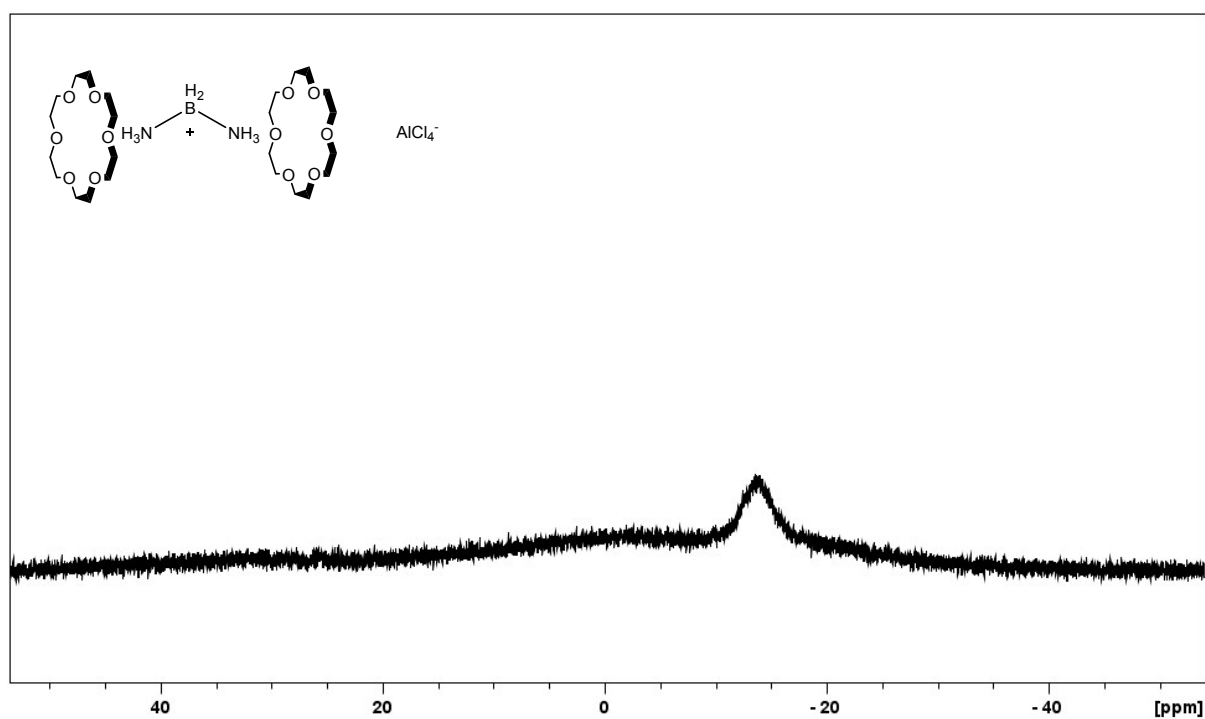

**Figure S5** <sup>11</sup>B NMR spectrum of [BH<sub>2</sub>(NH<sub>3</sub>)<sub>2</sub>(18-C-6)<sub>2</sub>][AlCl<sub>4</sub>] in CDCl<sub>3</sub>.

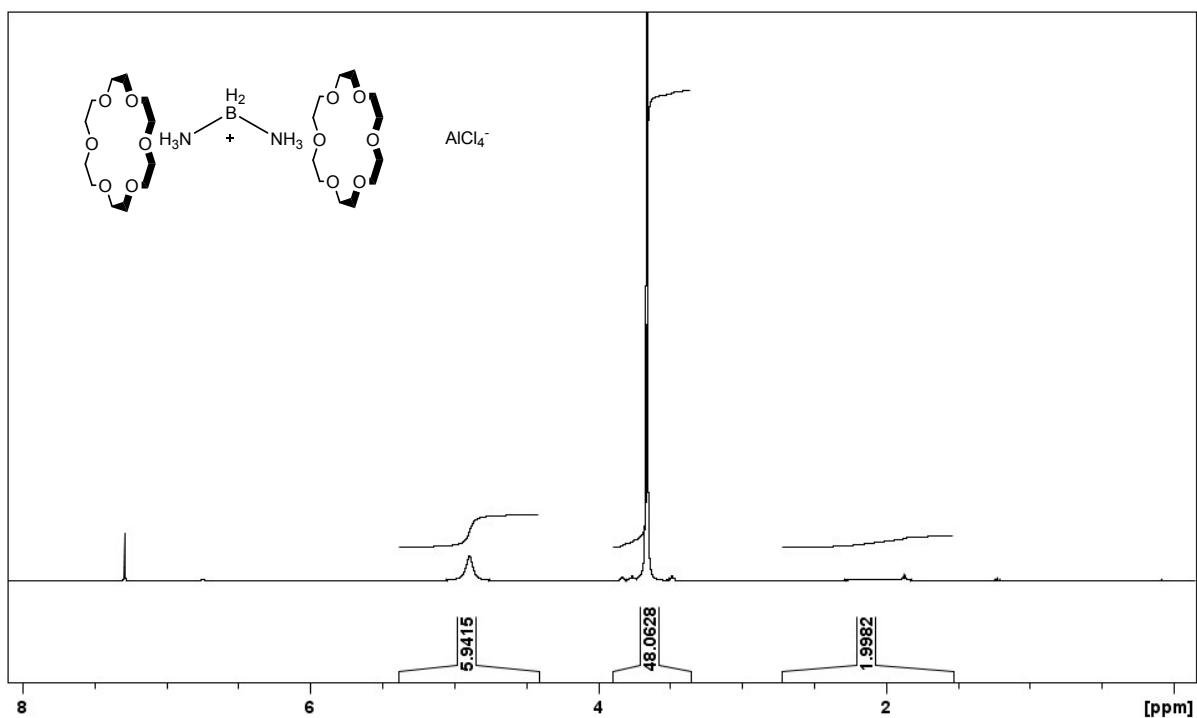

**Figure S6**  $^1\text{H}$  NMR spectrum of  $[\text{BH}_2(\text{NH}_3)_2(18\text{-C-6})_2][\text{AlCl}_4]$  in  $\text{CDCl}_3$ .

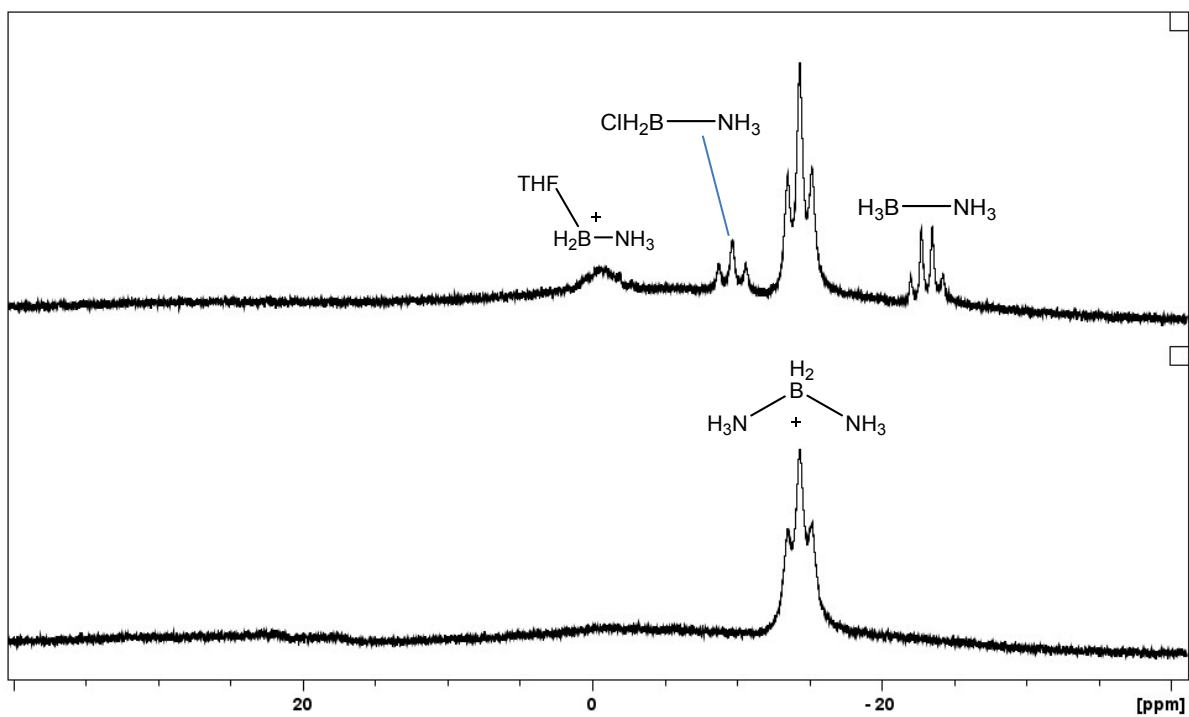

**Figure S7** *In situ*  $^{11}\text{B}$  NMR spectra of reaction of AB,  $\text{NH}_4\text{Cl}$  and  $\text{AlCl}_3$  (1:1:1) in refluxing THF after 2h (above), 16h (below).

**Synthesis of  $[(Et_3N)BH_2NH_3(18-C-6)][AlCl_4]$**  **$[1 \cdot Et_3N(18-C-6)][AlCl_4]$** 

Triethylamine (60  $\mu$ l, 43 mg, 0.43 mmol) was added to a solution of  $[(THF)BH_2NH_3(18-C-6)][AlCl_4]$  (230 mg, 0.43 mmol) in 2 ml DCM at  $-78^\circ C$ . The reaction mixture was allowed to warm to room temperature and was stirred for 16h, filtered and layered with 10 ml hexane in a 20 mm diameter tube. After 3d crystals were collected and dried *in vacuo* (114 mg, 47 %).

Found (%): C 37.90, H 8.12, N 4.96; Calculated for  $C_{18}H_{44}AlBCl_4N_2O_6$ : C 38.32, H 7.86, N 4.97.

$^{11}B$  NMR (128.4 MHz, 25  $^\circ C$ ,  $CDCl_3$ ),  $\delta/ppm = -9.2$  (br).

$^1H$  NMR (400.1 MHz, 25  $^\circ C$ ,  $CDCl_3$ ),  $\delta/ppm = 5.11$  (br s, 3H,  $NH_3$ ), 3.66 (s, 24H, 18-C-6), 2.90 (q,  $J = 7.3$  Hz, 6H,  $NCH_2CH_3$ ), 1.96 (br, 2H,  $BH_2$ ), 1.24 (t, 9H,  $J = 7.3$  Hz, 9H,  $NCH_2CH_3$ ).

$^{13}C$  NMR (100.6 MHz, 25  $^\circ C$ ,  $CDCl_3$ ),  $\delta/ppm = 70.18$  (18-C-6), 48.98 ( $NCH_2CH_3$ ), 8.10 ( $NCH_2CH_3$ ).

Note: When this reaction was performed in THF rather than DCM, subsequent layering with hexane resulted in crystallisation of  $[2(18-C-6)_2][AlCl_4]$  instead.

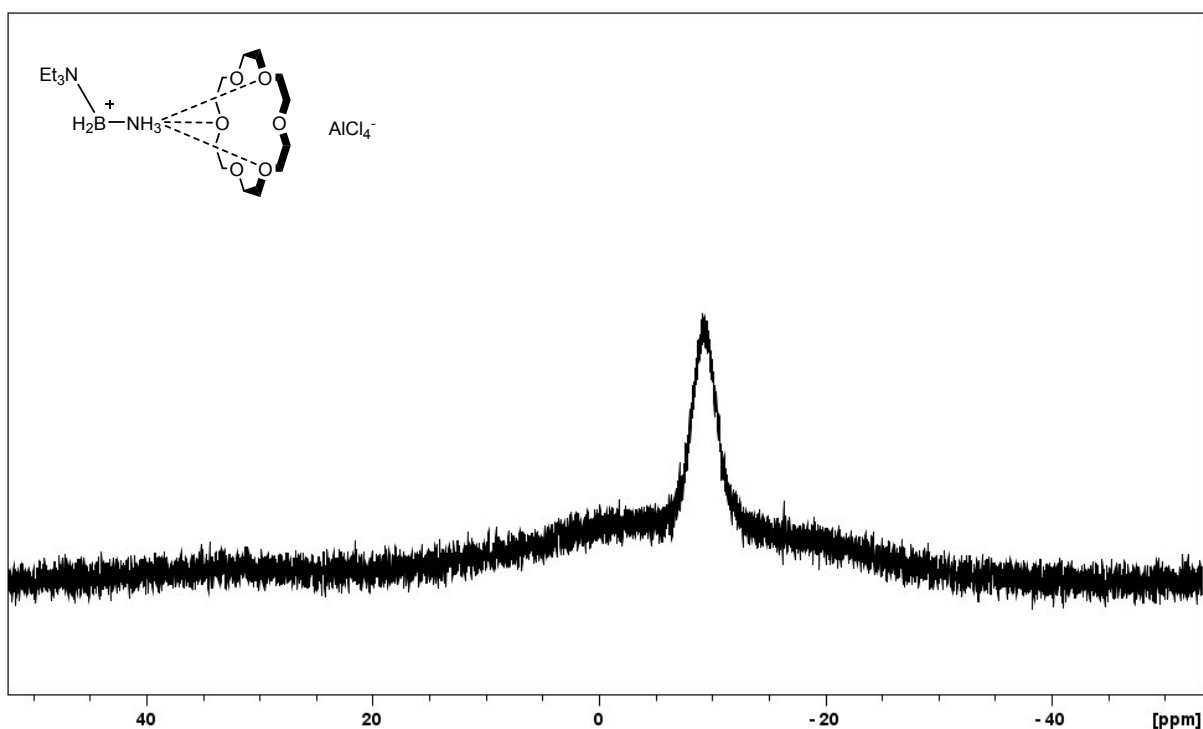

**Figure S8**  $^{11}B$  NMR spectrum of  $[(Et_3N)BH_2NH_3(18-C-6)][AlCl_4]$  in  $CDCl_3$ .

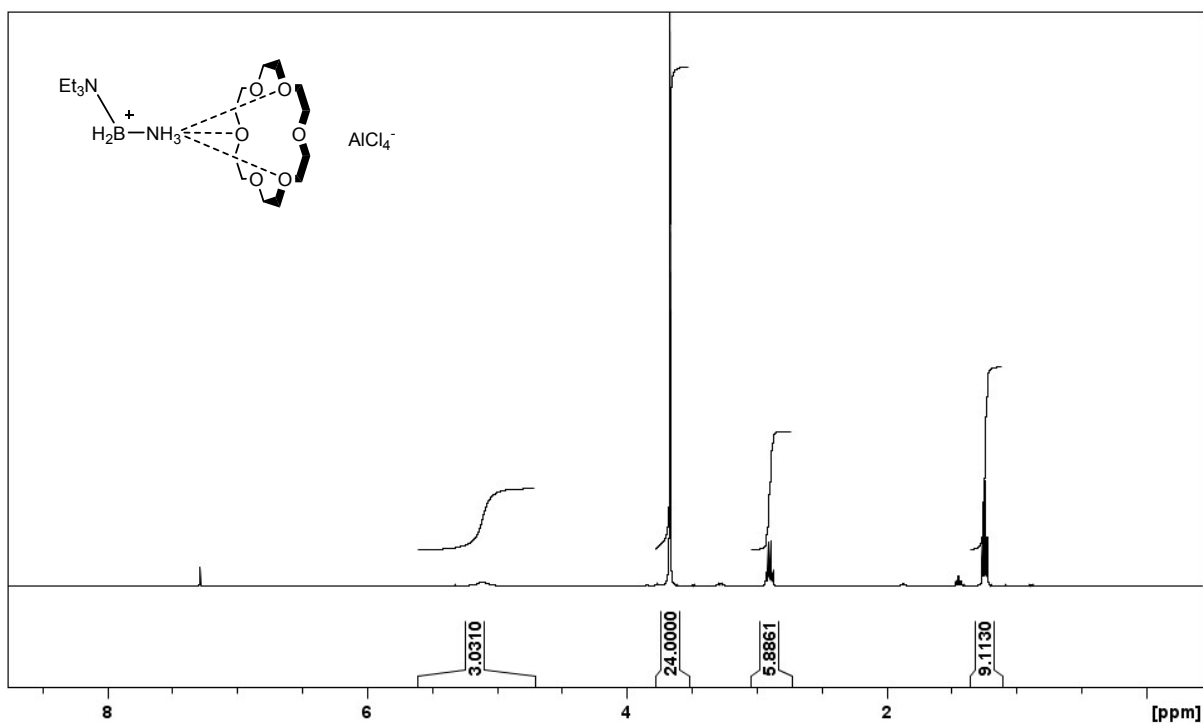

**Figure S9**  $^1\text{H}$  NMR spectrum of  $[(\text{Et}_3\text{N})\text{BH}_2\text{NH}_3(18\text{-C-}6)][\text{AlCl}_4]$  in  $\text{CDCl}_3$ .

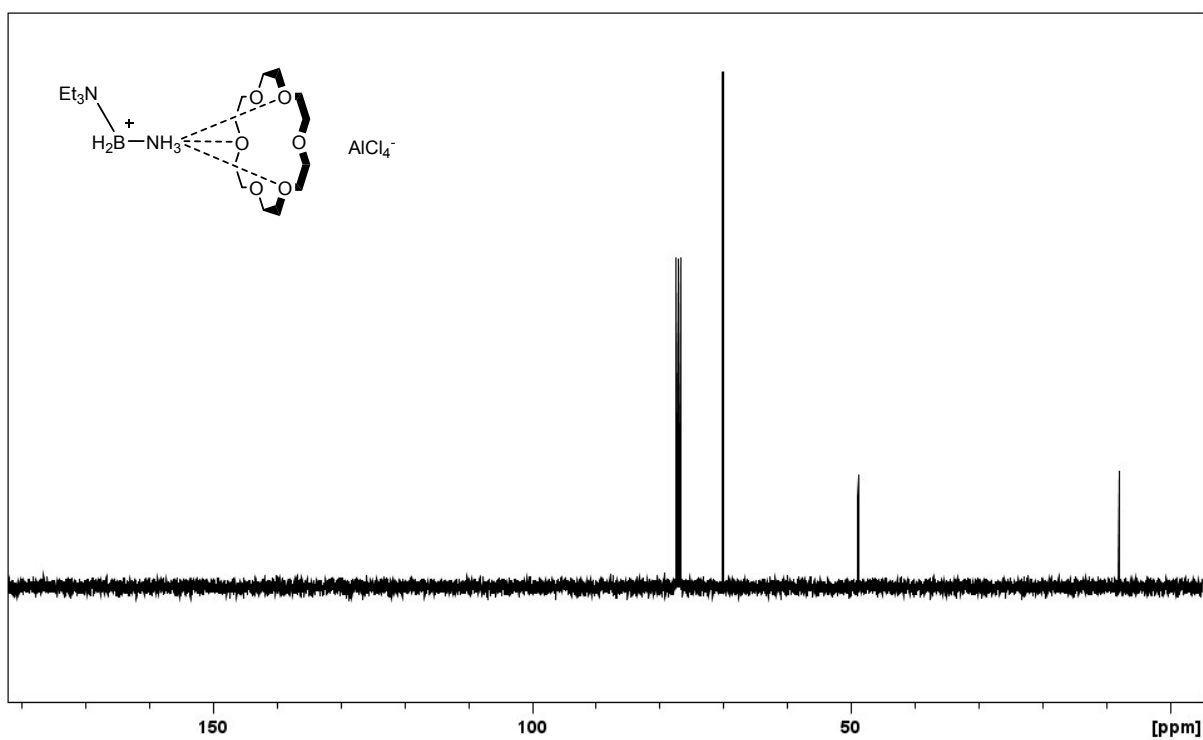

**Figure S10**  $^{13}\text{C}\{^1\text{H}\}$  NMR spectrum of  $[(\text{Et}_3\text{N})\text{BH}_2\text{NH}_3(18\text{-C-}6)][\text{AlCl}_4]$  in  $\text{CDCl}_3$ .

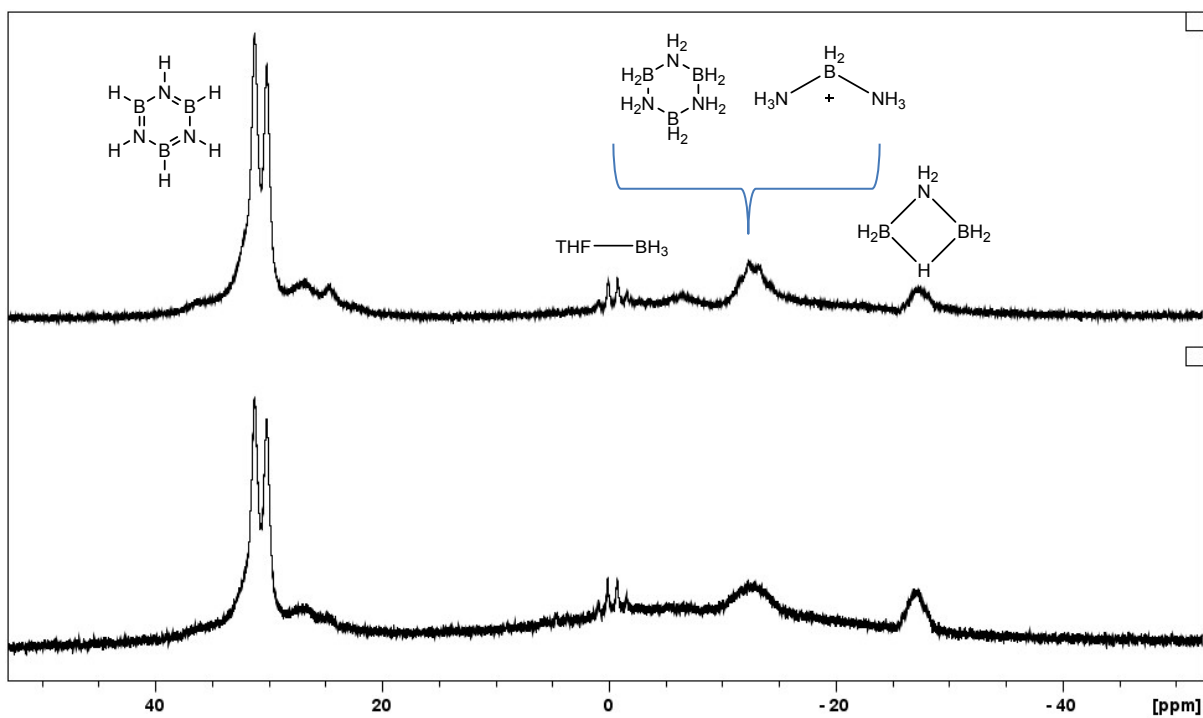

**Figure S11** *In situ*  $^{11}\text{B}$  NMR spectra of: AB +  $\text{AlCl}_3$  (33% eq.) 16h reflux in THF (above); AB +  $[(\text{THF})\text{BH}_2\text{NH}_3(18\text{-C-6})][\text{AlCl}_4]$  (10% eq.) 16h reflux in THF (below).



***In situ* variable-temperature NMR study of reaction of AB + 18-C-6 (1 eq.) with AlCl<sub>3</sub> (4 eq.).**

A solution of AlCl<sub>3</sub> (85 mg, 0.64 mmol) in 0.3 ml d<sub>8</sub>-THF was injected into an NMR tube containing a solution of amine borane (5 mg, 0.16 mmol) and 18-crown-6 (42 mg, 0.16 mmol) in 0.2 ml d<sub>8</sub>-THF held at -78°C and shaken before transferring to the spectrometer. <sup>11</sup>B and <sup>1</sup>H spectra were collected at -40°C and at further 10°C intervals until room temperature.

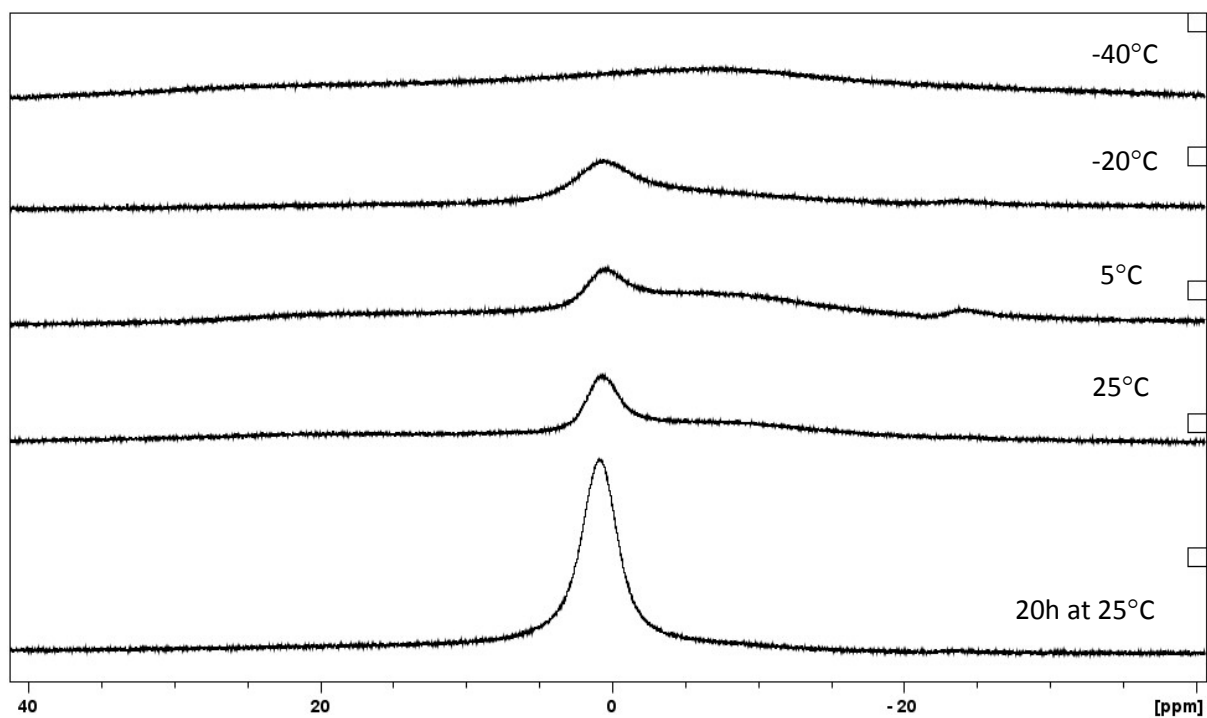

**Figure S12** *In situ* variable-temperature <sup>11</sup>B NMR spectra of reaction of AB + 18-C-6 (1 eq.) with AlCl<sub>3</sub> (4 eq.) in d<sub>8</sub>-THF.

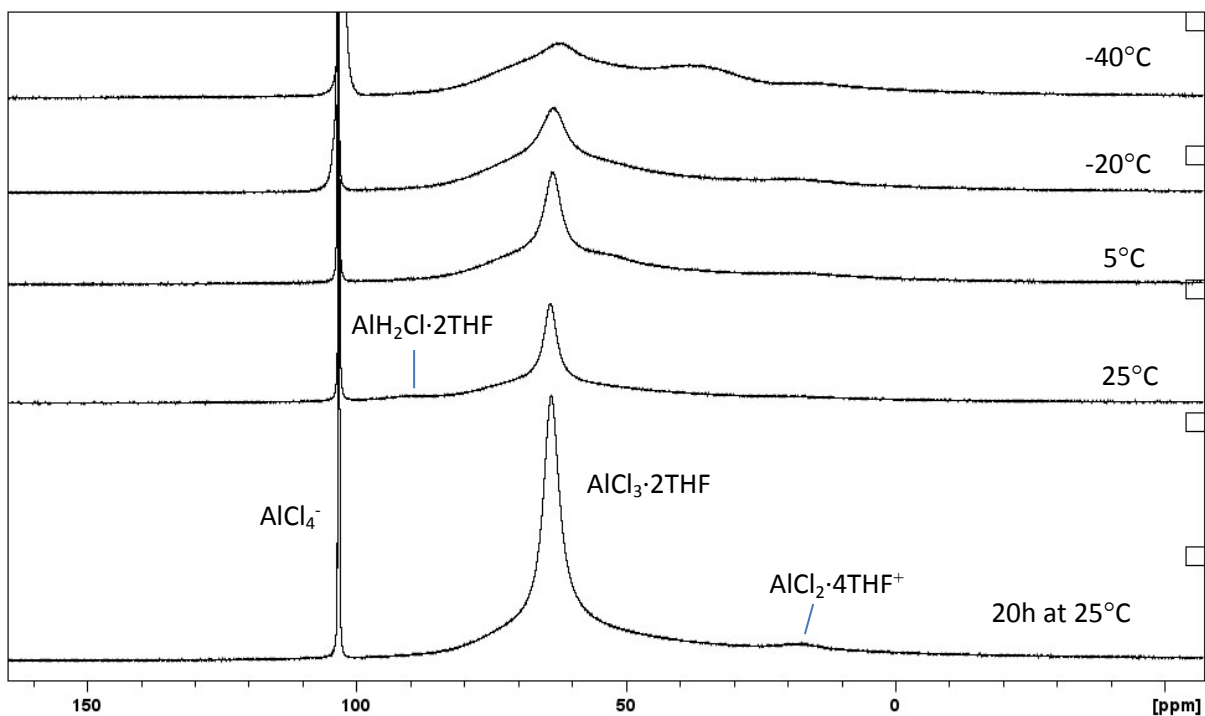

**Figure S13** *In situ* variable-temperature  $^{27}\text{Al}$  NMR spectra of reaction of AB + 18-C-6 (1 eq.) with  $\text{AlCl}_3$  (4 eq.) in  $d_8$ -THF.

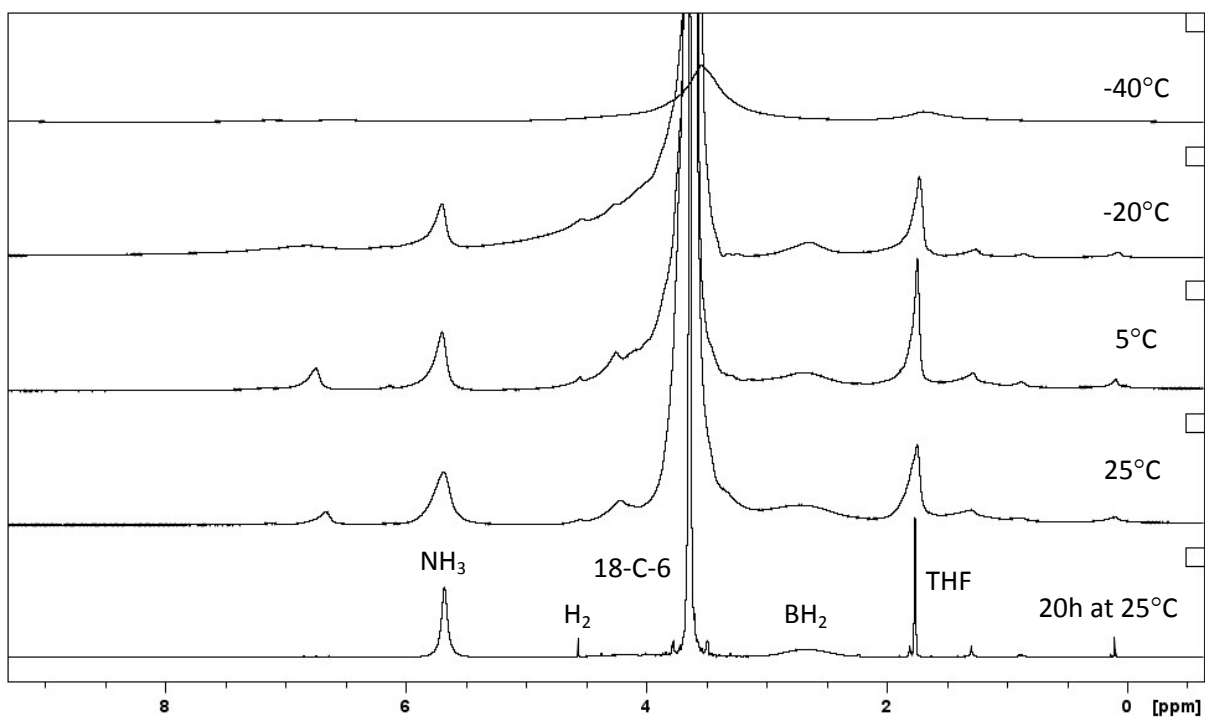

**Figure S14** *In situ* variable-temperature  $^1\text{H}$  NMR spectra of reaction of AB + 18-C-6 (1 eq.) with  $\text{AlCl}_3$  (4 eq.) in  $d_8$ -THF.

***In situ* variable-temperature  $^{11}\text{B}$  NMR study of reaction of  $[(\text{THF})\text{BH}_2\text{NH}_3(18\text{-C-6})][\text{AlCl}_4]$  with diisopropylethylamine**

$i\text{Pr}_2\text{EtN}$  (33  $\mu\text{l}$ , 24 mg, 0.19 mmol) was injected directly into an NMR tube containing  $[(\text{THF})\text{BH}_2\text{NH}_3(18\text{-C-6})][\text{AlCl}_4]$  (50 mg, 0.09 mmol) in 0.5 ml  $\text{CD}_2\text{Cl}_2$  held at  $-78^\circ\text{C}$  and shaken before transferring to the spectrometer.  $^{11}\text{B}$  and  $^1\text{H}$  spectra were collected at  $-40^\circ\text{C}$  and at further  $10^\circ\text{C}$  intervals until room temperature.

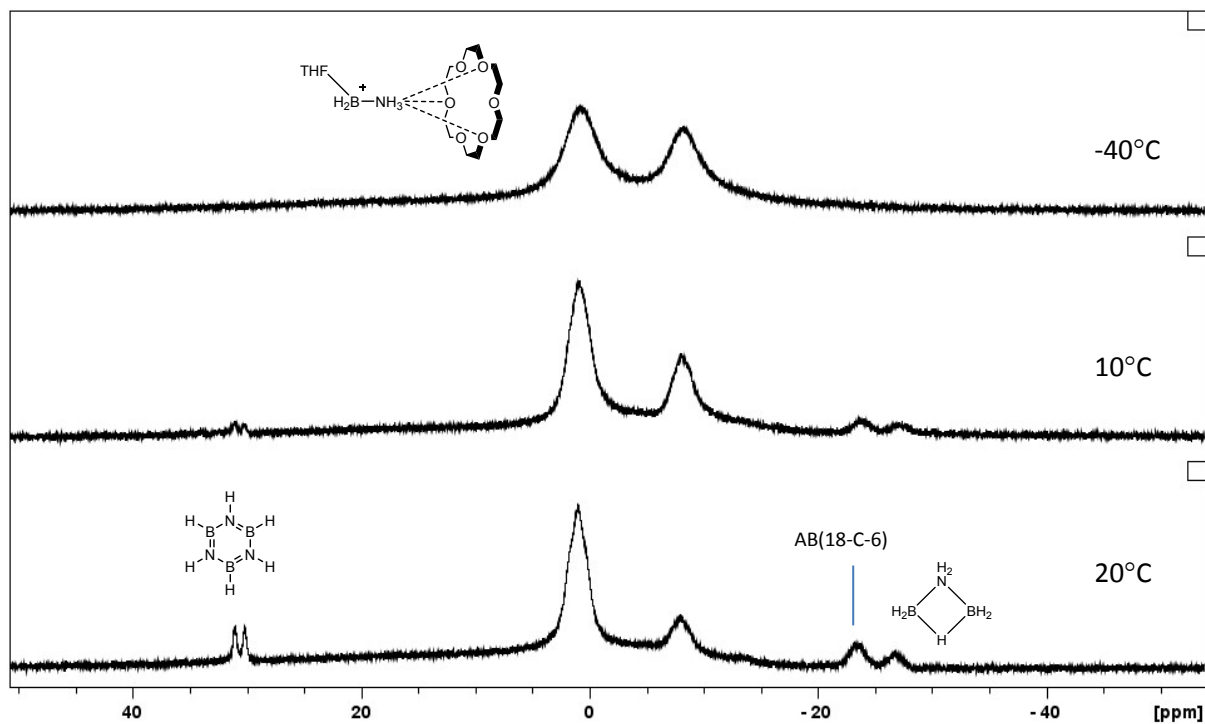

**Figure S15** *In situ* variable temperature  $^{11}\text{B}$  NMR spectra of  $[(\text{Et}_3\text{N})\text{BH}_2\text{NH}_3(18\text{-C-6})][\text{AlCl}_4] + i\text{Pr}_2\text{EtN}$  (2 eq.) in  $\text{CD}_2\text{Cl}_2$ .

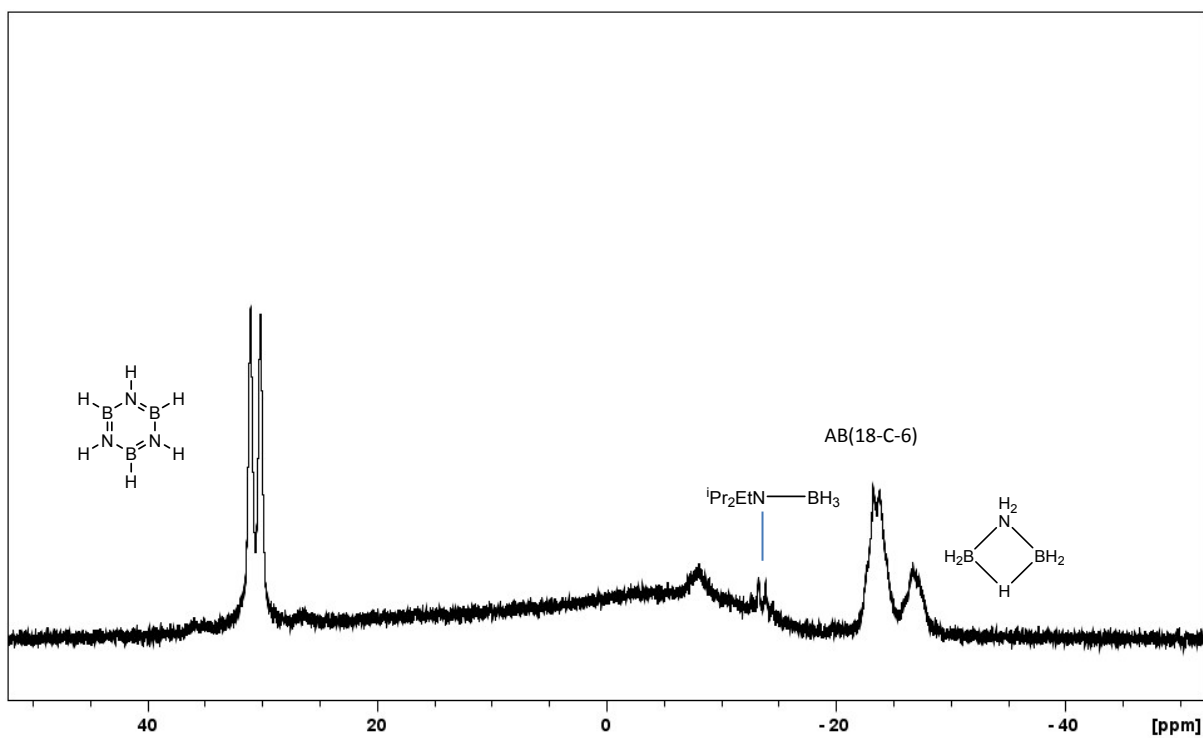

**Figure S16** *In situ* variable temperature  $^{11}\text{B}$  NMR spectrum of  $[(\text{Et}_3\text{N})\text{BH}_2\text{NH}_3(18\text{-C-}6)][\text{AlCl}_4] + i\text{Pr}_2\text{EtN}$  (2 eq.) in  $\text{CD}_2\text{Cl}_2$  after shaking again at room temperature.

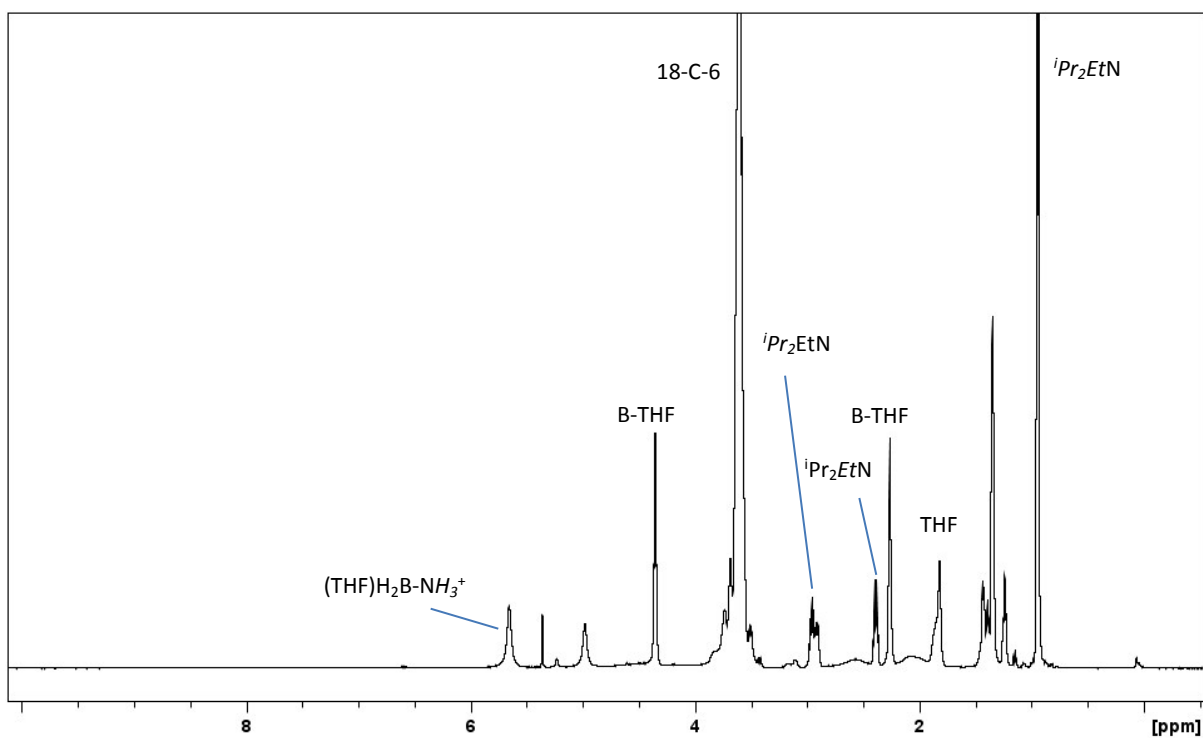

**Figure S17** *In situ* variable temperature  $^1\text{H}$  NMR spectrum of  $[(\text{Et}_3\text{N})\text{BH}_2\text{NH}_3(18\text{-C-}6)][\text{AlCl}_4] + i\text{Pr}_2\text{EtN}$  (2 eq.) in  $\text{CD}_2\text{Cl}_2$  ( $-40^\circ\text{C}$ ).

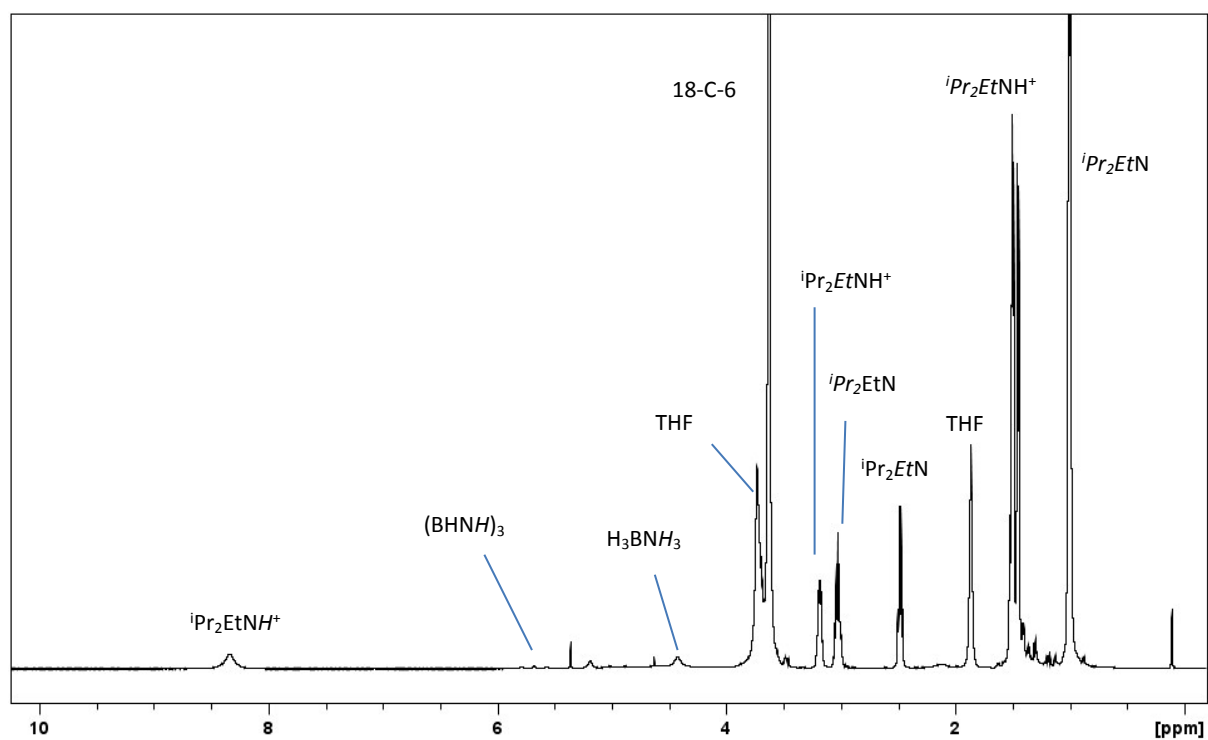

**Figure S18** *In situ* variable temperature  $^1\text{H}$  NMR spectrum of  $[(\text{Et}_3\text{N})\text{BH}_2\text{NH}_3(18\text{-C-6})][\text{AlCl}_4] + i\text{Pr}_2\text{EtN}$  (2 eq.) in  $\text{CD}_2\text{Cl}_2$  (room temperature after shaking sample).

### Growth of crystals for X-ray diffraction

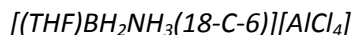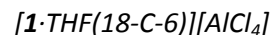

$\text{AlCl}_3$  (258 mg, 1.93 mmol) was added to a solution of ammonia borane (20 mg, 0.65 mmol) and 18-crown-6 (172 mg, 0.65 mmol) in 3 ml THF and stirred at room temperature for 16h. Layering of 1 ml of the reaction mixture with hexane in a narrow (1cm diameter) tube produced crystals after standing for several days.

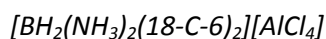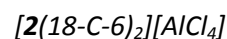

Method 1: from AB +  $\text{AlCl}_3$  / THF reflux

$\text{AlCl}_3$  (87 mg, 0.65 mmol) was added to a solution of ammonia borane (20 mg, 0.65 mmol) and 18-crown-6 (172 mg, 0.65 mmol) in 2 ml THF and the mixture heated to reflux for 16h. Layering of 1 ml of the reaction mixture with hexane in a narrow (10 mm diameter) tube produced crystals after standing for several days.

Method 2: from  $[\mathbf{1}\cdot\text{THF}(18\text{-C-6})][\text{AlCl}_4]$  +  $\text{Et}_3\text{N}$  / THF

Triethylamine (50  $\mu\text{l}$ , 37 mg, 0.36 mmol) was added to a solution of  $[(\text{THF})\text{BH}_2\text{NH}_3(18\text{-C-6})][\text{AlCl}_4]$  (100 mg, 0.23 mmol) in 2 ml THF at room temperature and was stirred for 16h. Layering of 1 ml of the reaction mixture with hexane in a narrow (10 mm diameter) tube produced crystals after standing for several days.

Both methods gave crystals of identical unit cell parameters. The data presented are those obtained from method 2.

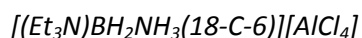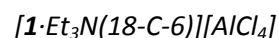

Triethylamine (50  $\mu\text{l}$ , 37 mg, 0.36 mmol) was added to a solution of  $[(\text{THF})\text{BH}_2\text{NH}_3(18\text{-C-6})][\text{AlCl}_4]$  (100 mg, 0.23 mmol) in 3 ml DCM at room temperature and was stirred for 16h. The solution was filtered and layered with hexane in a 20 mm diameter tube, which produced crystals after standing for several days.

## X-Ray Crystallography

Data for all complexes were collected at 180(2) K on a Bruker D8-QUEST diffractometer using an Incoatec  $\mu$ S Cu microsource ( $\lambda = 1.5418 \text{ \AA}$ ). Crystals were mounted directly from solution using perfluorohydrocarbon oil to prevent atmospheric oxidation, hydrolysis, and solvent loss. Structures were solved using SHELXT (Sheldrick, 2015) and refined using SHELXL-2014 (Sheldrick, 2015).

| CCDC No.                                   | 1443249                                                                                                            | 1443250                                                                                                                                               | 1443248                                                                                                                                        |
|--------------------------------------------|--------------------------------------------------------------------------------------------------------------------|-------------------------------------------------------------------------------------------------------------------------------------------------------|------------------------------------------------------------------------------------------------------------------------------------------------|
| Compound                                   | [(THF)BH <sub>2</sub> NH <sub>3</sub> (18-C-6)]<br>[AlCl <sub>4</sub> ]<br><br>[1·THF(18-C-6)][AlCl <sub>4</sub> ] | [BH <sub>2</sub> (NH <sub>3</sub> ) <sub>2</sub> (18-C-6) <sub>2</sub> ]<br>[AlCl <sub>4</sub> ]<br><br>[2(18-C-6) <sub>2</sub> ][AlCl <sub>4</sub> ] | [(Et <sub>3</sub> N)BH <sub>2</sub> NH <sub>3</sub> (18-C-6)]<br>[AlCl <sub>4</sub> ]<br><br>[1·Et <sub>3</sub> N(18-C-6)][AlCl <sub>4</sub> ] |
| Chemical formula                           | C <sub>16</sub> H <sub>37</sub> AlBCl <sub>4</sub> NO <sub>7</sub>                                                 | C <sub>24</sub> H <sub>56</sub> AlBCl <sub>4</sub> N <sub>2</sub> O <sub>12</sub>                                                                     | C <sub>18</sub> H <sub>44</sub> AlBCl <sub>4</sub> N <sub>2</sub> O <sub>6</sub>                                                               |
| FW / g·mol <sup>-1</sup>                   | 535.05                                                                                                             | 744.29                                                                                                                                                | 564.14                                                                                                                                         |
| Crystal system                             | Orthorhombic                                                                                                       | Monoclinic                                                                                                                                            | Orthorhombic                                                                                                                                   |
| Space group                                | Pna2 <sub>1</sub>                                                                                                  | Pn                                                                                                                                                    | Pna2 <sub>1</sub>                                                                                                                              |
| <i>a</i> / Å                               | 19.0847(7)                                                                                                         | 13.6132(5)                                                                                                                                            | 12.7434(3)                                                                                                                                     |
| <i>b</i> / Å                               | 16.0369(6)                                                                                                         | 16.0212(6)                                                                                                                                            | 13.7696(3)                                                                                                                                     |
| <i>c</i> / Å                               | 8.8244(3)                                                                                                          | 17.7762(7)                                                                                                                                            | 16.4706(4)                                                                                                                                     |
| $\beta$ / °                                |                                                                                                                    | 94.329(2)                                                                                                                                             |                                                                                                                                                |
| <i>V</i> / Å <sup>3</sup>                  | 2700.79(17)                                                                                                        | 3865.9(3)                                                                                                                                             | 2890.12(12)                                                                                                                                    |
| <i>Z</i>                                   | 4                                                                                                                  | 4                                                                                                                                                     | 4                                                                                                                                              |
| $\rho_{\text{calcd}}$ / g·cm <sup>-3</sup> | 1.316                                                                                                              | 1.279                                                                                                                                                 | 1.187                                                                                                                                          |
| $\mu$ / mm <sup>-1</sup>                   | 4.589                                                                                                              | 3.457                                                                                                                                                 | 4.296                                                                                                                                          |
| Reflections collected                      | 16779                                                                                                              | 53146                                                                                                                                                 | 17536                                                                                                                                          |
| Independent reflections                    | 4023                                                                                                               | 14383                                                                                                                                                 | 4838                                                                                                                                           |
| <i>R</i> <sub>int</sub>                    | 0.060                                                                                                              | 0.058                                                                                                                                                 | 0.038                                                                                                                                          |
| <i>R</i> 1 [ <i>I</i> > 2σ( <i>I</i> )]    | 0.099                                                                                                              | 0.075                                                                                                                                                 | 0.032                                                                                                                                          |
| w <i>R</i> 2 (all data)                    | 0.219                                                                                                              | 0.194                                                                                                                                                 | 0.072                                                                                                                                          |

|                 |         |          |          |
|-----------------|---------|----------|----------|
| Flack parameter | 0.02(2) | 0.25(2)* | 0.15(2)* |
|-----------------|---------|----------|----------|

\* Refined as an inversion twin.
